# Supplementary material for: Cdk5 knocking out mediated by CRISPR-Cas9 genome editing for PD-L1 attenuation and enhanced antitumor immunity
Source: PubMed Central journal article supplement — Acta Pharm Sin B. 2019 Jul 23;10(2):358–73. doi: 10.1016/j.apsb.2019.07.004 (PMC7016277; doi:10.1016/j.apsb.2019.07.004), 2019-07-23
Supplement: mmc1.pdf [file mmc1.pdf]

## Supporting information for

### ORIGINAL ARTICLE

#### ***Cdk5* knocking out mediated by *CRISPR-Cas9* genome editing for PD-L1 attenuation and enhanced antitumor immunity**

**Huan Deng<sup>a,†</sup>, Songwei Tan<sup>a,†</sup>, Xueqin Gao<sup>a</sup>, Chenming Zou<sup>a</sup>, Chenfeng Xu<sup>a</sup>, Kun Tu<sup>a</sup>, Qingle Song<sup>a</sup>, Fengjuan Fan<sup>b</sup>, Wei Huang<sup>c</sup>, Zhiping Zhang<sup>a,d,e,\*</sup>**

<sup>a</sup>*School of Pharmacy, Tongji Medical College, Huazhong University of Science and Technology, Wuhan 430030, China*

<sup>b</sup>*Institute of Hematology, Union Hospital, Tongji Medical College, Huazhong University of Science and Technology, Wuhan 430030, China*

<sup>c</sup>*Department of Orthopedics, Union Hospital, Tongji Medical College, Huazhong University of Science and Technology, Wuhan 430030, China*

<sup>d</sup>*National Engineering Research Center for Nanomedicine, Huazhong University of Science and Technology, Wuhan 430030, China*

<sup>e</sup>*Hubei Engineering Research Center for Novel Drug Delivery System, Huazhong University of Science and Technology, Wuhan 430030, China*

<sup>†</sup>These authors made equal contributions to this work.

\*Corresponding author.

E-mail address: zhipingzhang@hust.edu.cn (Zhiping Zhang)

**Table S1** Four potential target sites of *Cdk5* gene in mouse genome and the primers respectively.

| Target locus | Sequence                 | Primer F                      | Primer R                      |
|--------------|--------------------------|-------------------------------|-------------------------------|
| sgCdk5-1     | CAGGCTGGAT<br>GATGACGATG | TCTGAAGACCCTA<br>CTTGCAGTCCCA | GCCTCTAACATCC<br>CAATACCAGCCC |
| sgCdk5-2     | GTGTGCCAAG<br>TTCAGCCCTC | GCCTTTGCCCTGA<br>GAACTTACCCTT | AGGCAAGTAGTCC<br>TTGGTAGGCAGA |
| sgCdk5-3     | CCGGGAAACT<br>CATGAGATTG | CCTTAGCAATCTC<br>TGTGGACCAGCC | TTAGCCACATCTC<br>CAAGTTGGCCTC |
| sgCdk5-4     | GGTCCCTATG<br>TAGCACGTTG | TTGTACTCCCACA<br>CATCCCTCCAGT | GCCAGGCCAAAAT<br>CAGCCAATTTCA |

**Table S2** Primers utilized for qRT-PCR analysis.

| Target locus | Primer F                      | Primer R                     |
|--------------|-------------------------------|------------------------------|
| <i>Cdk5</i>  | ACAGCCGCAACGTGCTACAT<br>AG    | CATGTCGATGGACGTGGAG<br>TACA  |
| <i>p35</i>   | AAGAACCTATCTGACATGCT<br>GCTAT | ACAAAATTCTCCTGGTTCGC         |
| <i>PD-L1</i> | AGCTACGGTGGTGCGGACTA          | GGTGACACTTCTCTTCCCAC<br>TCAC |
| <i>GAPDH</i> | GAGAGTGTTTCCTCGTCCCG<br>TA    | TGAGGTCAATGAAGGGGTC<br>G     |

**Table S3** Stability and zeta potential of aPBAE/Cas9-Cdk5 (80:1) in 24 h.

|                              | Diameter (nm)    | $\zeta$ -potential (mV) |
|------------------------------|------------------|-------------------------|
| aPBAE/Cas9-Cdk5              | 246.3 $\pm$ 30.1 | 23.8 $\pm$ 2.0          |
| aPBAE/Cas9-Cdk5 (after 24 h) | 270.3 $\pm$ 88.6 | 22.4 $\pm$ 3.3          |

**Table S4** Representative flow cytometry data about CD8<sup>+</sup> to CD4<sup>+</sup> ratio and percentage of CD4<sup>+</sup>Foxp3<sup>+</sup> cells.

| Ratio                                | PBS  | Naked pDNA | aPBAE/Cas9-null | aPBAE/Cas9-Cdk5 |
|--------------------------------------|------|------------|-----------------|-----------------|
| CD8 <sup>+</sup> to CD4 <sup>+</sup> | 0.82 | 0.92       | 0.98            | 1.55            |
|                                      | 0.87 | 1.20       | 1.08            | 2.02            |
|                                      | 0.93 | 1.33       | 1.23            | 2.00            |
|                                      | 0.92 | 0.74       | 0.87            | 1.65            |
| CD4 <sup>+</sup> Foxp3 <sup>+</sup>  | 0.6  | 0.7        | 0.6             | 0.1             |
|                                      | 0.5  | 0.6        | 0.3             | 0.1             |
|                                      | 0.8  | 0.5        | 0.6             | 0.2             |
|                                      | 0.6  | 0.6        | 0.5             | 0.2             |

**Table S5** The particle size characterization of aPBAE/Cas9-Cdk5 at different ratios.

| No.     | Diameter of particle (nm) at different ratio |       |       |       |       |       |       |
|---------|----------------------------------------------|-------|-------|-------|-------|-------|-------|
|         | 10:1                                         | 20:1  | 40:1  | 60:1  | 80:1  | 100:1 | 120:1 |
| 1       | 242                                          | 288.2 | 118.8 | 185.4 | 138   | 285   | 276.3 |
| 2       | 294.4                                        | 401.2 | 232.2 | 250.6 | 181.6 | 301.8 | 336.5 |
| 3       | 358.1                                        | 490.6 | 246.4 | 266.7 | 196.3 | 319.5 | 358   |
| 4       | 529.9                                        | 599.8 | 261.4 | 283.9 | 212.2 | 338.3 | 380.8 |
| 5       | 644.6                                        | 683.3 | 277.4 | 302.1 | 259.3 | 358.2 | 445.2 |
| 6       | 435.6                                        | 480.5 | 394.4 | 351.6 | 313.1 | 379.3 | 370.9 |
| Average | 417.4                                        | 490.6 | 255.1 | 273.3 | 216.7 | 330.3 | 361.2 |

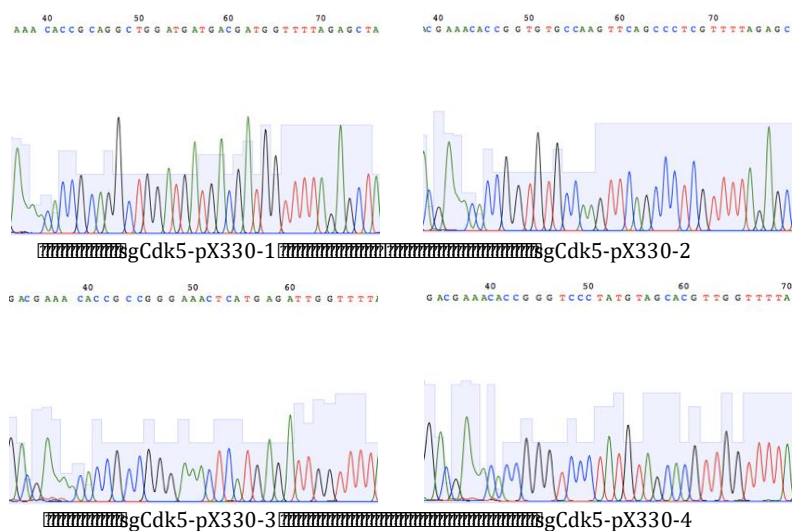

**Figure S1** The construction of four potential target sites of *Cdk5* gene sequences into pX330 vector.

**A**

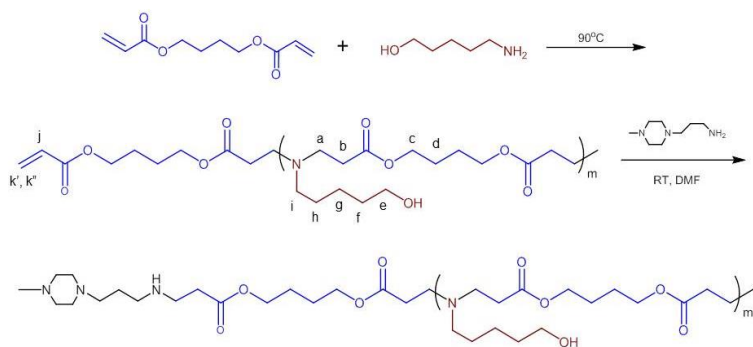

**B**

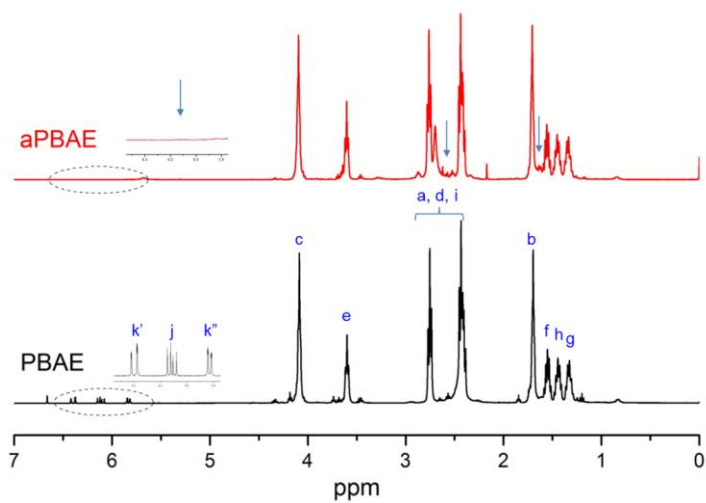

**Figure S2** (A) Synthetic scheme of PBAE copolymer. (B)  $^1\text{H}$  NMR spectra of PBAE and aPBAE (solvent:  $\text{CDCl}_3$ ).

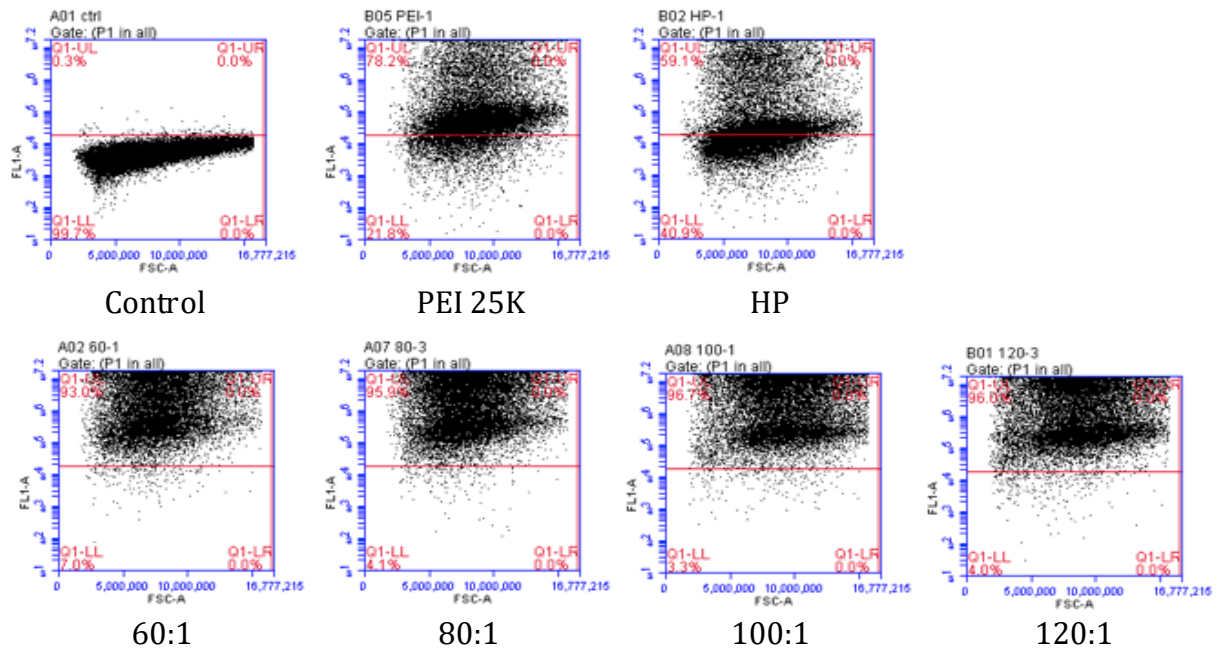

**Figure S3** Scatter plots for the transfection efficiency of aPBAE/pMax-GFP with different weight ratios in B16F10 cells, PEI 25K and HP reagent used as controls.

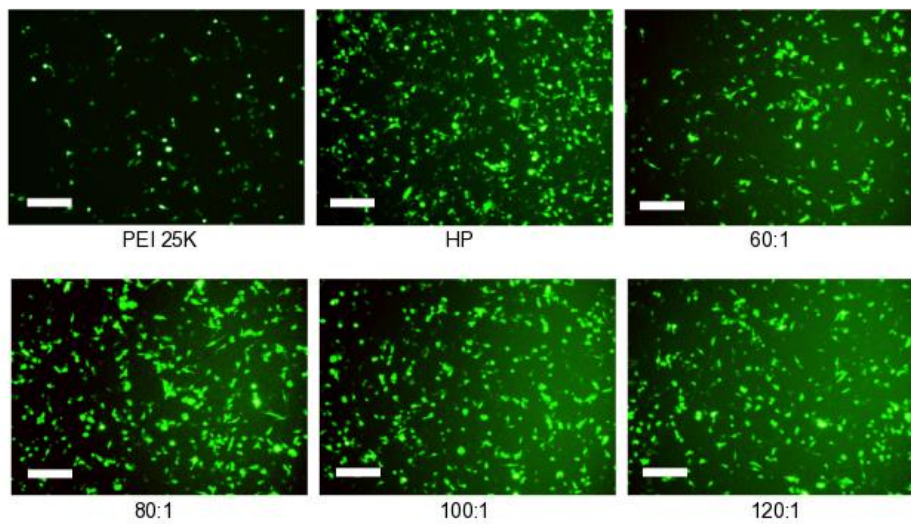

**Figure S4** The transfection efficiency of aPBAE/pMax-GFP with different weight ratios in 4T1 cells, PEI 25K and HP reagent used as controls. The scale bar is 200  $\mu\text{m}$ .

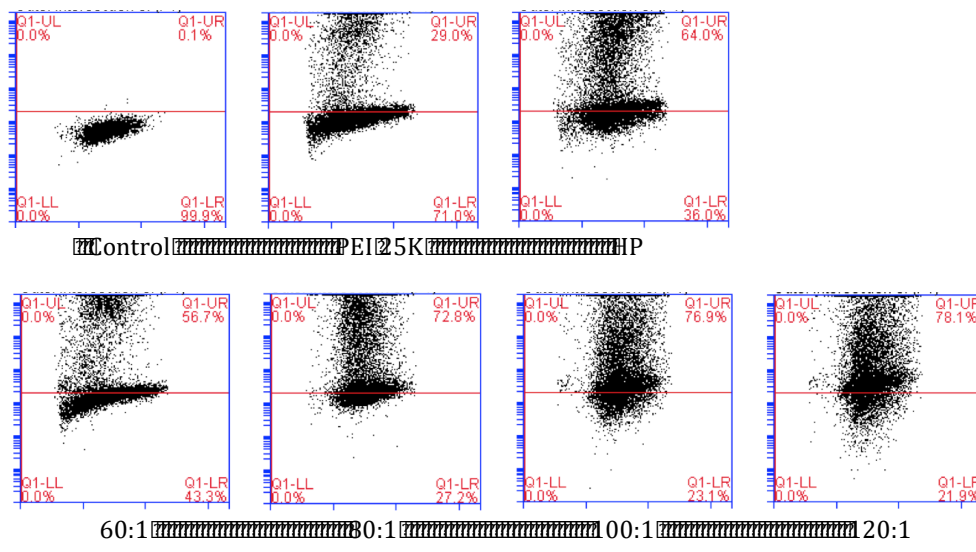

**Figure S5** Scatter plots for the transfection efficiency of aPBAE/pMax-GFP with different weight ratios in 4T1 cells, PEI 25K and HP reagent used as controls.

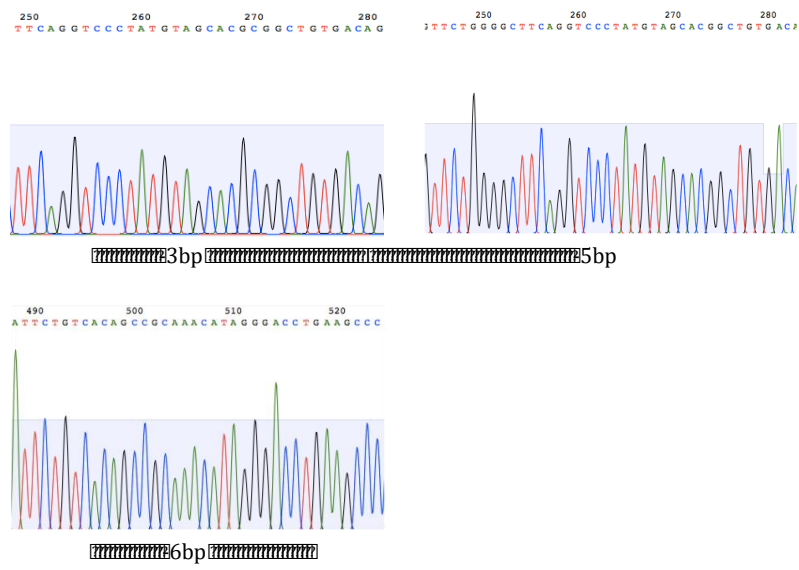

**Figure S6** Representative indel mutation sequences after aPBAE/Cas9-Cdk5 treatment *in vitro*.

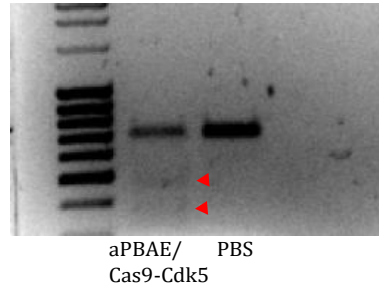

**Figure S7** T7EI assay was performed from the tumor tissues of melanoma bearing mice after aPBAE/Cas9-Cdk5 treatment compared to PBS group *in vivo*.

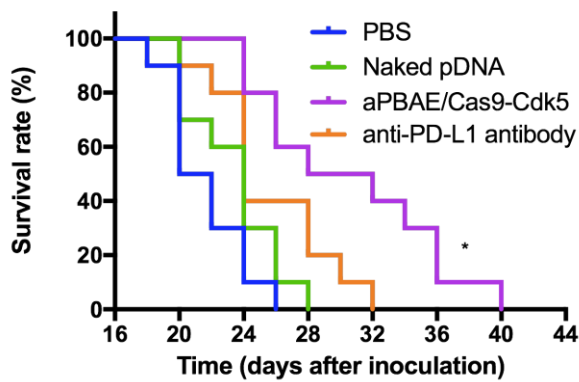

**Figure S8** Survival rate of mice treated with PBS, naked pDNA, aPBAE/Cas9-Cdk5 and anti-PD-L1 antibody, respectively ( $n=10$ ). Data were expressed as mean  $\pm$  SD.

\*  $P < 0.05$ .

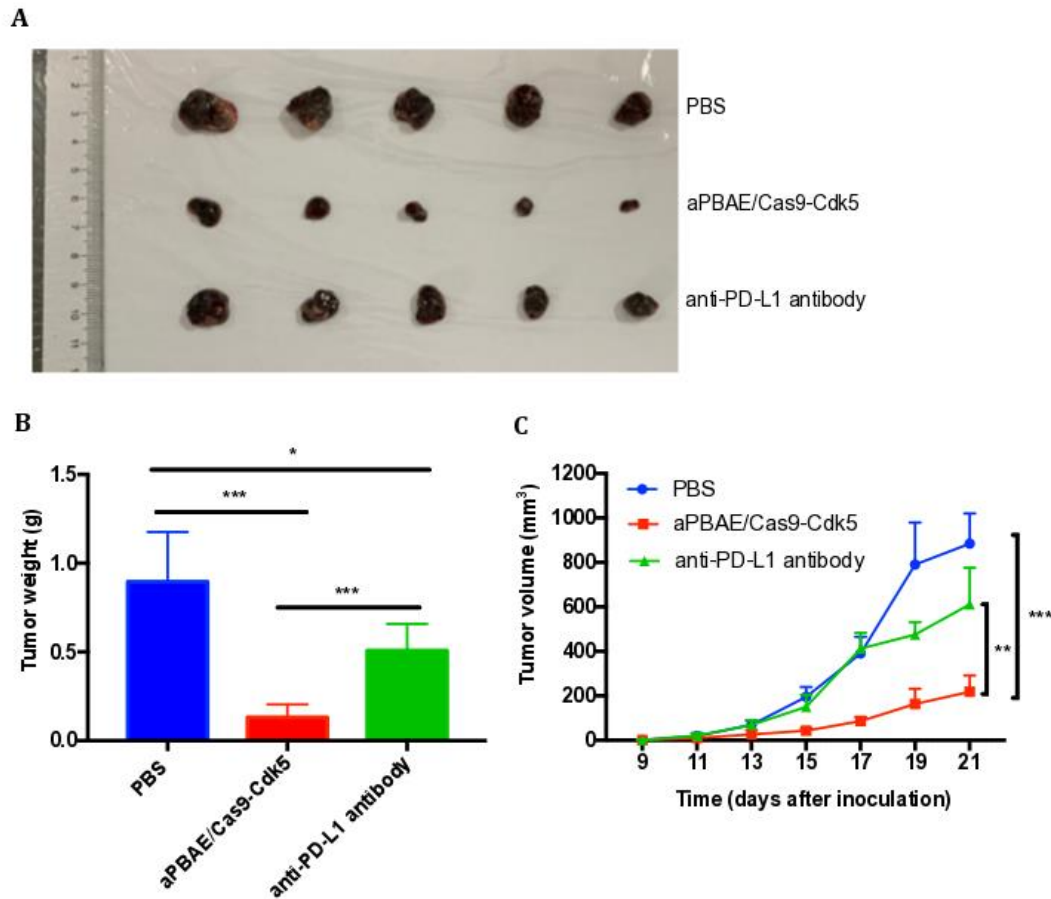

**Figure S9** CRISPR-Cas9 mediated PD-L1 attenuation suppressed B16F10 tumor growth. (A) Photographs of tumor dissected from C57BL/6 mice treated with PBS, aPBAE/Cas9-Cdk5 or anti-PD-L1 antibody ( $n=5$ ). (B) Tumor weight of the mice ( $n=5$ ). (C) Tumor growth curve of the mice after different treatments ( $n=5$ ). Data were expressed as mean  $\pm$ SD. \*  $P<0.05$ , \*\*  $P<0.01$ , \*\*\*  $P<0.005$ .

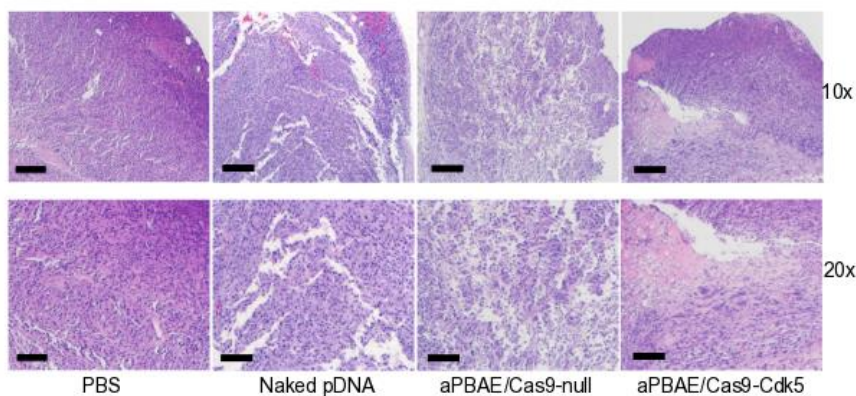

**Figure S10** H&E staining sections of the B16F10 tumors after treatment. The scale bars are 200  $\mu\text{m}$  and 100  $\mu\text{m}$  respectively.



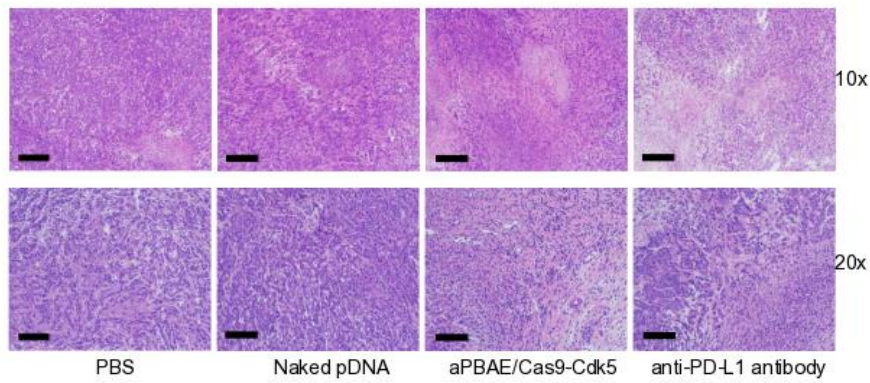

**Figure S11** H&E staining sections of the 4T1 tumors after treatment. The scale bars are 200  $\mu$ m and 100  $\mu$ m, respectively.

**A**

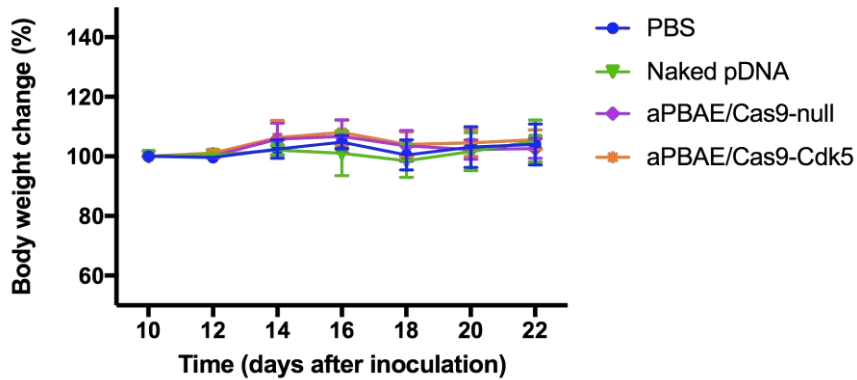

**B**

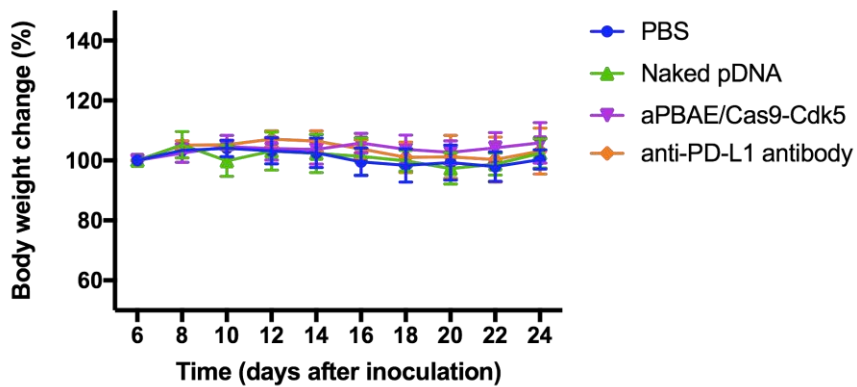

**Figure S12** Mice body weight after treatment. (A) B16F10 tumor model, C57BL/6 mice ( $n=6$ ). (B) 4T1 tumor model, BALB/c mice ( $n=6$ ). Data were expressed as mean  $\pm$ SD.

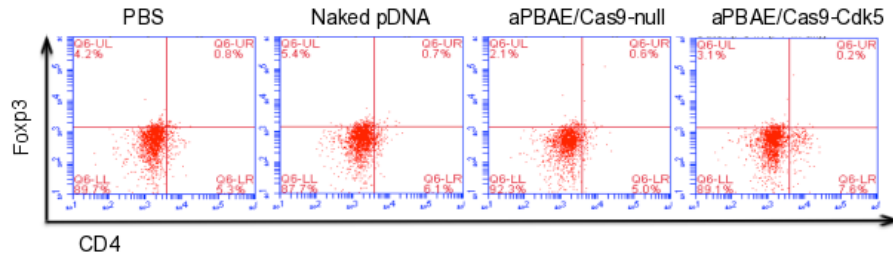

**Figure S13** Scatter plots of CD4<sup>+</sup>Foxp3<sup>+</sup> cells in B16F10 tumors after treatment.

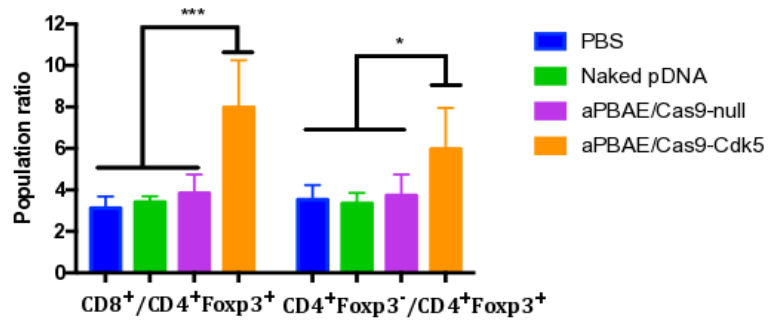

**Figure S14** Ratios of CD8<sup>+</sup> T cells to CD4<sup>+</sup>Foxp3<sup>+</sup> T cells and CD4<sup>+</sup>Foxp3<sup>-</sup> T cells to CD4<sup>+</sup>Foxp3<sup>+</sup> T cells in B16F10 tumors (n=6). Data were expressed as mean±SD. \**P*<0.05, \*\*\**P*<0.005

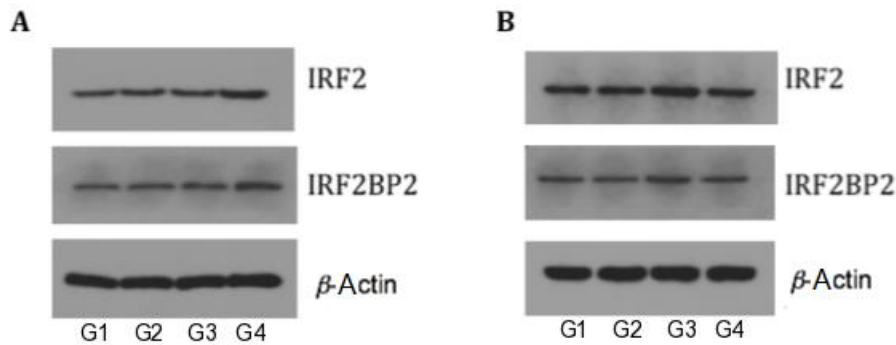

**Figure S15** Representative protein expression of IRF2 and IRF2BP2 in (A) melanoma (PBS (G1), naked pDNA (G2), aPBAE/Cas9-null (G3), aPBAE/Cas9-Cdk5 (G4)) and (B) breast cancer models (PBS (G1), naked pDNA (G2), aPBAE/Cas9-Cdk5 (G3), anti-PD-L1 antibody (G4)) after treatments.

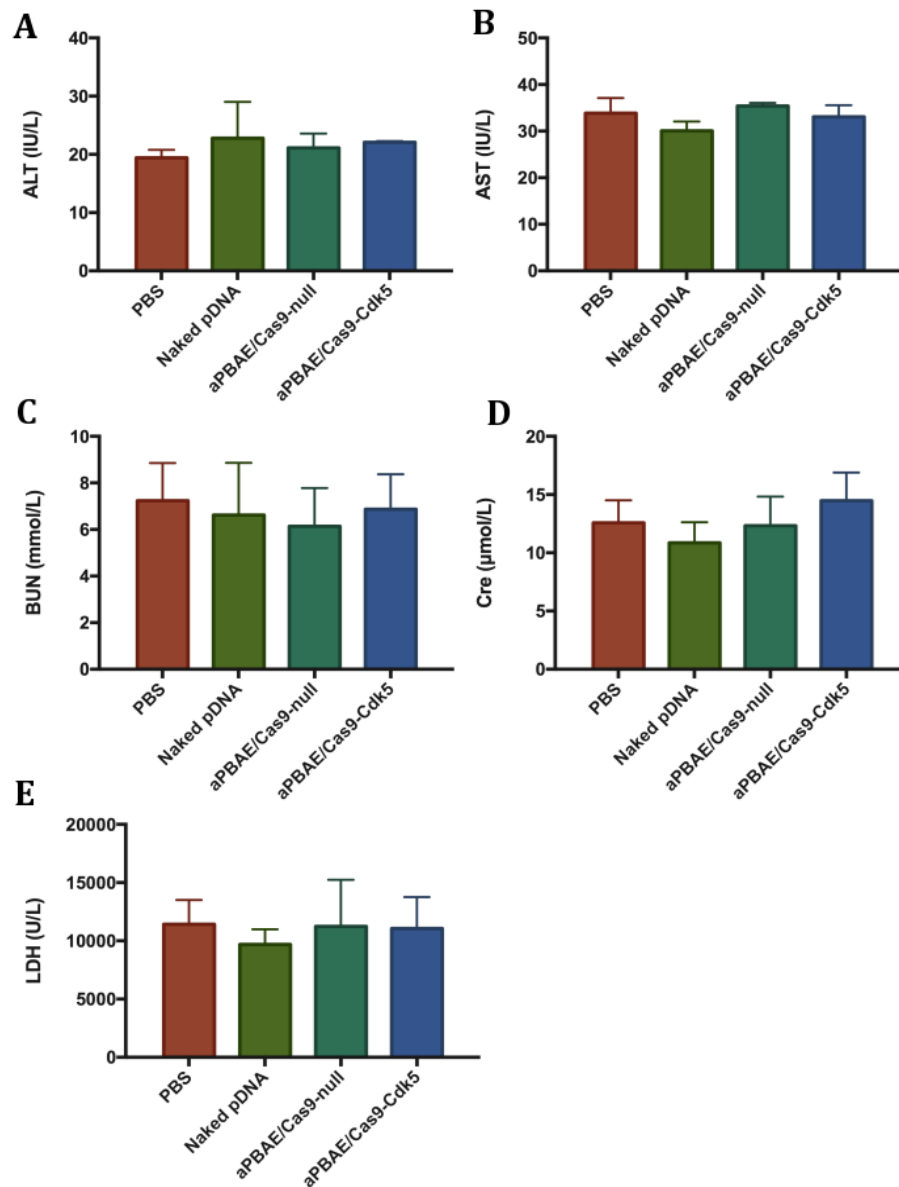

**Figure S16** Serum chemistry indexes in C57BL/6 mice after treatment. (A) ALT, (B) AST, (C) BUN, (D) Cre and (E) LDH (n=6). Data were expressed as mean  $\pm$ SD.

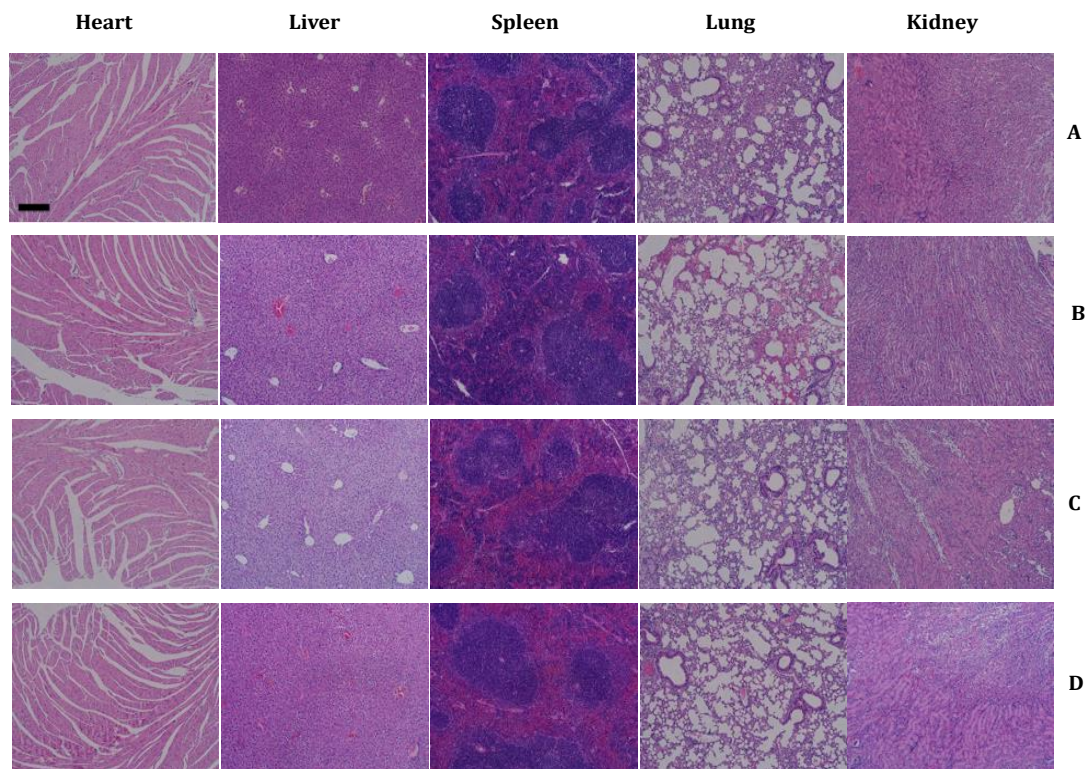

**Figure S17** H & E staining sections of organs from C57BL/6 mice after treatment. (A) PBS, (B) naked pDNA, (C) aPBAE/Cas9-null and (D) aPBAE/Cas9-Cdk5. The scale bars are 200  $\mu$ m.

**Appendix S1** Deep sequencing of Cas9-Cdk5 plasmid.

```

AATGACGATCGCTCGCATTGTCTGAGTAGGTGTCATTCTATTCTGGGGGGTG
GGGTGGGGCAGGACAGCAAGGGGGAGGATTGGGAAGAGAATAGCAGGCA
TGCTGGGGAGCGGCCCGCAGGAACCCCTAGTGATGGAGTTGGCCACTCCCT
CTCTGCGCGCTCGCTCGCTCACTGAGGCCGGGCGACCAAAGGTCGCCCCGA
CGCCCGGGCTTTGCCCGGGCGGCCTCAGTGAGCGAGCGAGCGCGCAGCTG
CCTGCAGGGGCGCCTGATGCGGTATTTTCTCCTTACGCATCTGTGCGGTATT
TCACACCGCATACTGTCAAAGCAACCATAGTACGCGCCCTGTAGCGGCGCAT
TAAGCGCGGCGGGTGTGGTGGTTACGCGCAGCGTGACCGCTACACTTGCC
AGCGCCTTAGCGCCCGCTCCTTTTCGCTTTCTTCCCTTCCCTTCTCGCCACGT
TCGCCGGCTTTCCCCGTCAAGCTCTAAATCGGGGGCTCCCTTTAGGGTTCC
GATTTAGTGCTTTACGGCACCTCGACCCCAAAAACTTGATTTGGGTGATG
GTTACGTAGTGGGCCATCGCCCTGATAGACGGTTTTTCGCCCTTTGACGTT
GGAGTCCACGTTCTTTAATAGTGGACTCTTGTTCCAAACTGGAACAACACT
CAACTCTATCTCGGGCTATTCTTTTGATTTATAAGGGATTTTGCCGATTTCCG
TCTATTGGTTAAAAAATGAGCTGATTTAACAAAAATTTAACGCGAATTTTAA
CAAAATATTAACGTTTACAATTTTATGGTGCACCTCTCAGTACAATCTGCTCT
GATGCCGCATAGTTAAGCCAGCCCCGACACCCGCCAACACCCGCTGACGC

```

GCCCTGACGGGCTTGTCTGCTCCCGGCATCCGCTTACAGACAAGCTGTGAC  
CGTCTCCGGGAGCTGCATGTGTCAGAGGTTTTACCGTCATCACCGAAACG  
CGCGAGACGAAAGGGCCTCGTGATACGCCTATTTTTATAGGTTAATGTCATG  
ATAATAATGGTTTCTTAGACGTCAGGTGGCACTTTTCGGGGAAATGTGCGC  
GGAACCCCTATTTGTTTATTTTTCTAAATACATTCAAATATGTATCCGCTCATG  
AGACAATAACCCTGATAAATGCTTCAATAATATTGAAAAAGGAAGAGTATG  
AGTATTCAACATTTCCGTGTCGCCCTTATTCCCTTTTTTTCGGGCATTTTGCCT  
TCCTGTTTTTGTCTACCCAGAAACGCTGGTGAAAGTAAAAGATGCTGAAGA  
TCAGTTGGGTGCACGAGTGGGTACATCGAACTGGATCTCAACAGCGGTAA  
GATCCTTGAGAGTTTTTCGCCCGAAGAACGTTTTCCAATGATGAGCACTTT  
TAAAGTTCTGCTATGTGGCGCGGTATTATCCCGTATTGACGCCGGGCAAGAG  
CAACTCGGTCGCCGCATACACTATTCTCAGAATGACTTGGTTGAGTACTCA  
CCAGTCACAGAAAAGCATCTTACGGATGGCATGACAGTAAGAGAATTATGC  
AGTGCTGCCATAACCATGAGTGATAACACTGCGGCCAACTTACTTCTGACA  
ACGATCGGAGGACCGAAGGAGCTAACCGCTTTTTTGCACAACATGGGGGA  
TCATGTAACCTGCCTTGATCGTTGGGAACCGGAGCTGAATGAAGCCATACC  
AAACGACGAGCGTGACACCACGATGCCTGTAGCAATGGCAACAACGTTGC  
GCAAACCTATTAACCTGGCGAACTACTTACTCTAGCTTCCCGGCAACAATTAAT  
AGACTGGATGGAGGCGGATAAAGTTGCAGGACCACTTCTGCGCTCGGCC  
TTCCGGCTGGCTGGTTTATTGCTGATAAATCTGGAGCCGGTGAGCGTGGAA  
GCCGCGGTATCATTGCAGCACTGGGGCCAGATGGTAAGCCCTCCCGTATCG  
TAGTTATCTACACGACGGGGAGTCAGGCAACTATGGATGAACGAAATAGAC  
AGATCGCTGAGATAGGTGCCTCACTGATTAAGCATTGGTAACCTGTCAGACC  
AAGTTTACTCATATATACTTTAGATTGATTTAAAACCTTCATTTTTAATTTAAA  
GGATCTAGGTGAAGATCCTTTTTGATAATCTCATGACCAAATCCCTTAACG  
TGAGTTTTCGTTCCACTGAGCGTCAGACCCCGTAGAAAAGATCAAAGGATC  
TTCTTGAGATCCTTTTTTTCTGCGCGTAATCTGCTGCTTGCAAACAAAAAA  
CCACCCGCTACCAGCGGTGGTTTGTGTTGCCGGATCAAGAGCTACCAACTCT  
TTTTCCGAAGGTAACCTGGCTTCAGCAGAGCGCAGATACCAAATACTGTTCT  
TCTAGTGTAGCCGTAGTTAGGCCACCACTTCAAGAACTCTGTAGCACCGCC  
TACATACCTCGCTCTGCTAATCCTGTTACCAGTGGCTGCTGCCAGTGGCGAT  
AAGTCGTGTCTTACCGGGTTGGACTCAAGACGATAGTTACCGGATAAGGCG  
CAGCGGTTCGGGCTGAACGGGGGGTTCGTGCACACAGCCCAGCTTGGAGCG  
AACGACCTACACCGAACTGAGATACCTACAGCGTGAGCTATGAGAAAGCG  
CCACGCTTCCCGAAGGGAGAAAGGCGGACAGGTATCCGGTAAGCGGCAGG  
GTCGGAACAGGAGAGCGCACGAGGGAGCTTCCAGGGGGAAACGCCTGGT  
ATCTTTATAGTCCTGTCGGGTTTTCGCCACCTCTGACTTGAGCGTCGATTTTT  
GTGATGCTCGTCAGGGGGGCGGAGCCTATGGAAAAACGCCAGCAACGCGG  
CCTTTTTACGGTTCCTGGCCTTTTTGCTGGCCTTTTGTCTACATGTGAGGGCC  
TATTTCCCATGATTCCCTTCATATTTGCATATACGATACAAGGCTGTTAGAGAG  
ATAATTGGAATTAATTTGACTGTAAACACAAAGATATTAGTACAAAATACGT  
GACGTAGAAAGTAATAATTTCTTGGGTAGTTTGCAGTTTTAAATTAATGTTTT  
AAAATGGACTATCATATGCTTACCGTAACTTGAAGTATTTTCGATTTCTTGG  
CTTTATATATCTTGTGGAAAGGACGAAACACCGGGTCCCTATGTAGCACGTT

GGTTTTAGAGCTAGAAATAGCAAGTTAAAATAAGGCTAGTCCGTTATCAAC  
TTGAAAAAGTGGCACCGAGTCGGTGCTTTTTTTGTTTTAGAGCTAGAAATAG  
CAAGTTAAAATAAGGCTAGTCCGTTTTTAGCGCGTGCGCCAATTCTGCAGA  
CAAATGGCTCTAGAGGTACCCGTTACATAACTTACGGTAAATGGCCCCGCT  
GGCTGACCGCCCAACGACCCCCGCCATTGACGTCAATAGTAACGCCAATA  
GGGACTTTCCATTGACGTCAATGGGTGGAGTATTTACGGTAAACTGCCCAC  
TTGGCAGTACATCAAGTGTATCATATGCCAAGTACGCCCCCTATTGACGTCA  
ATGACGGTAAATGGCCCCGCTGGCATTGTGCCAGTACATGACCTTATGGG  
ACTTTCCTACTTGGCAGTACATCTACGTATTAGTCATCGCTATTACCATGGTC  
GAGGTGAGCCCCACGTTCTGCTTCACTCTCCCCATCTCCCCCCCCCTCCCCA  
CCCCCAATTTTGTATTTATTTATTTTTTTAATTATTTTGTGCAGCGATGGGGGC  
GGAGGGAGGGGGGGGGCGCGCGCCAGGCGGGGCGGGGCGGCGCGAGGG  
GCGGGGCGGGGCGAGGCGGAGAGGTGCGGCGGCAGCCAATCAGAGCGGC  
GCGCTCCGAAAGTTTCCTTTTATGGCGAGGCGGCGGCGGCGGCCCTAT  
AAAAGCGAAGCGCGCGGGCGGGAGTCGCTGCGCGCTGCCTTCGCC  
CCGTGCCCGCTCCGCCCGCCCTCGCCGCCGCCCGCCCGGCTCTGACTG  
ACCGCGTTACTCCACAGGTGAGCGGGCGGGACGGCCCTTCTCCTCCGGG  
CTGTAATTAGCTGAGCAAGAGGTAAGGGTTTAAGGGATGGTTGGTTGGTGG  
GGTATTAATGTTTAATTACCTGGAGCACCTGCCTGAAATCACTTTTTTTCAG  
GTTGGACCGGTGCCACCATGGACTATAAGGACCACGACGGAGACTACAAG  
GATCATGATATTGATTACAAAGACGATGACGATAAGATGGCCCCAAAGAAG  
AAGCGGAAGGTTCGGTATCCACGGAGTCCCAGCAGCCGACAAGAAGTACAG  
CATCGGCCTGGACATCGGCACCAACTCTGTGGGCTGGGCCGTGATCACCGA  
CGAGTACAAGGTGCCAGCAAGAAATTCAAGGTGCTGGGCAACACCGACC  
GGCACAGCATCAAGAAGAACCTGATCGGAGCCCTGCTGTTTCGACAGCGGC  
GAAACAGCCGAGGCCACCCGGCTGAAGAGAACCGCCAGAAGAAGATACA  
CCAGACGGAAGAACCGGATCTGCTATCTGCAAGAGATCTTCAGCAACGAG  
ATGGCCAAGGTGGACGACAGCTTCTTCCACAGACTGGAAGAGTCCTTCT  
GGTGGAAGAGGATAAGAAGCACGAGCGGCACCCCATCTTCGGCAACATCG  
TGGACGAGGTGGCCTACCACGAGAAGTACCCACCATCTACCACCTGAGA  
AAGAACTGGTGGACAGCACCGACAAGGCCGACCTGCGGCTGATCTATCT  
GGCCCTGGCCACATGATCAAGTTCGGGGCCACTTCCTGATCGAGGGCGA  
CCTGAACCCCGACAACAGCGACGTGGACAAGCTGTTTCATCCAGCTGGTGC  
AGACCTACAACCAGCTGTTTCGAGGAAAACCCCATCAACGCCAGCGGCGTG  
GACGCCAAGGCCATCCTGTCTGCCAGACTGAGCAAGAGCAGACGGCTGGA  
AAATCTGATCGCCAGCTGCCCGGCGAGAAGAAGAATGGCCTGTTTCGGAA  
ACCTGATTGCCCTGAGCCTGGGCCTGACCCCAACTTCAAGAGCAACTTCG  
ACCTGGCCGAGGATGCCAACTGCAGCTGAGCAAGGACACCTACGACGAC  
GACCTGGACAACCTGCTGGCCAGATCGGCGACCAGTACGCCGACCTGTT  
TCTGGCCGCCAAGAACCTGTCCGACGCCATCCTGCTGAGCGACATCCTGAG  
AGTGAACACCGAGATCACCAAGGCCCCCCTGAGCGCCTCTATGATCAAGA  
GATACGACGAGCACACCAGGACCTGACCCTGCTGAAAGCTCTCGTGCGG  
CAGCAGCTGCCTGAGAAGTACAAAGAGATTTTCTTCGACCAGAGCAAGAA  
CGGCTACGCCGGCTACATTGACGGCGGAGCCAGCCAGGAAGAGTTCTACA

AGTTCATCAAGCCCATCCTGGAAAAGATGGACGGCACCGAGGAACTGCTC  
GTGAAGCTGAACAGAGAGGACCTGCTGCGGAAGCAGCGGACCTTCGACA  
ACGGCAGCATCCCCACCAGATCCACCTGGGAGAGCTGCACGCCATTCTGC  
GGCGGCAGGAAGATTTTACCCATTCTGAAGGACAACCGGGAAAAGATC  
GAGAAGATCCTGACCTTCCGCATCCCCTACTACGTGGGCCCTCTGGCCAGG  
GGAAACAGCAGATTCGCCTGGATGACCAGAAAGAGCGAGGAAACCATCAC  
CCCCTGGAACCTTCGAGGAAGTGGTGGACAAGGGCGCTTCCGCCAGAGCT  
TCATCGAGCGGATGACCAACTTCGATAAGAACCTGCCAACGAGAAGGTG  
CTGCCCAAGCACAGCCTGCTGTACGAGTACTTCACCGTGTATAACGAGCTG  
ACCAAAGTGAAATACGTGACCGAGGGAATGAGAAAGCCCGCCTTCCTGAG  
CGGCGAGCAGAAAAAGGCCATCGTGGACCTGCTGTTCAAGACCAACCGGA  
AAGTGACCGTGAAGCAGCTGAAAGAGGACTACTTCAAGAAAATCGAGTGC  
TTCGACTCCGTGGAAATCTCCGGCGTGGAAAGATCGGTTCAACGCCCTCCCTG  
GGCACATAACCAGATCTGCTGAAAATTATCAAGGACAAGGACTTCCTGGAC  
AATGAGGAAAACGAGGACATTCTGGAAGATATCGTGCTGACCCTGACACT  
GTTTGAGGACAGAGAGATGATCGAGGAACGGCTGAAAACCTATGCCACC  
TGTTTCGACGACAAAGTGATGAAGCAGCTGAAGCGGCGGAGATACACCGGC  
TGGGGCAGGCTGAGCCGGAAGCTGATCAACGGCATCCGGGACAAGCAGTC  
CGGCAAGACAATCCTGGATTTCTGAAGTCCGACGGCTTCGCCAACAGAA  
ACTTCATGCAGCTGATCCACGACGACAGCCTGACCTTTAAAGAGGACATCC  
AGAAAGCCAGGTGTCCGGCCAGGGCGATAGCCTGCACGAGCACATTGCC  
AATCTGGCCGGCAGCCCCGCCATTAAGAAGGGCATCCTGCAGACAGTGAA  
GGTGGTGGACGAGCTCGTGAAAGTGATGGGCCGGCACAAGCCCGAGAAC  
ATCGTGATCGAAATGGCCAGAGAGAACCAGACCACCCAGAAGGGACAGA  
AGAACAGCCGCGAGAGAATGAAGCGGATCGAAGAGGGCATCAAAGAGCT  
GGGCAGCCAGATCCTGAAAGAACACCCCGTGGAAAACACCCAGCTGCAG  
AACGAGAAGCTGTACCTGTACTACCTGCAGAATGGGCGGGATATGTACGTG  
GACCAGGAACTGGACATCAACCGGCTGTCCGACTACGATGTGGACCATATC  
GTGCCTCAGAGCTTTCTGAAGGACGACTCCATCGACAACAAGGTGCTGAC  
CAGAAGCGACAAGAACCGGGGCAAGAGCGACAACGTGCCCTCCGAAGAG  
GTCGTGAAGAAGATGAAGAACTACTGGCGGCAGCTGCTGAACGCCAAGCT  
GATTACCCAGAGAAAGTTCGACAATCTGACCAAGGCCGAGAGAGGCGGCC  
TGAGCGAACTGGATAAGGCCGGCTTCATCAAGAGACAGCTGGTGGAAACC  
CGGCAGATCACAAAGCACGTGGCACAGATCCTGGACTCCCGGATGAACAC  
TAAGTACGACGAGAATGACAAGCTGATCCGGGAAGTGAAAGTGATCACCC  
TGAAGTCCAAGCTGGTGTCCGATTTCCGGAAGGATTTCCAGTTTTACAAAG  
TGCGCGAGATCAACAACCTACCACCACGCCACGACGCCTACCTGAACGCC  
GTCGTGGGAACCGCCCTGATCAAAAAGTACCCTAAGCTGGAAAGCGAGTT  
CGTGTACGGCGACTACAAGGTGTACGACGTGCGGAAGATGATCGCCAAGA  
GCGAGCAGGAAATCGGCAAGGCTACCGCCAAGTACTTCTTCTACAGCAAC  
ATCATGAACTTTTTCAAGACCGAGATTACCCTGGCCAACGGCGAGATCCGG  
AAGCGGCCTCTGATCGAGACAAACGGCGAAACCGGGGAGATCGTGTGGGA  
TAAGGGCCGGGATTTTGCCACCGTGCAGGAAAGTGCTGAGCATGCCCAAG  
TGAATATCGTGAAAAGACCGAGGTGCAGACAGGCGGCTTCAGCAAAGAG

TCTATCCTGCCCAAGAGGAACAGCGATAAGCTGATCGCCAGAAAGAAGGA  
CTGGGACCCTAAGAAGTACGGCGGCTTCGACAGCCCCACCGTGGCCTATTC  
TGTGCTGGTGGTGGCCAAAGTGGAAAAGGGCAAGTCCAAGAACTGAAG  
AGTGTGAAAGAGCTGCTGGGGATCACCATCATGGAAAGAAGCAGCTTCGA  
GAAGAATCCCATCGACTTTCTGGAAGCCAAGGGCTACAAAGAAGTGAAAA  
AGGACCTGATCATCAAGCTGCCTAAGTACTCCCTGTTTCGAGCTGGAAAACG  
GCCGGAAGAGAATGCTGGCCTCTGCCGGCGAACTGCAGAAGGGAAACGA  
ACTGGCCCTGCCCTCCAAATATGTGAACTTCCTGTACCTGGCCAGCCACTAT  
GAGAAGCTGAAGGGCTCCCCCGAGGATAATGAGCAGAAACAGCTGTTTGT  
GGAACAGCACAAGCACTACCTGGACGAGATCATCGAGCAGATCAGCGAGT  
TCTCCAAGAGAGTGATCCTGGCCGACGCTAATCTGGACAAAGTGCTGTCCG  
CCTACAACAAGCACCGGGATAAGCCCATCAGAGAGCAGGCCGAGAATATC  
ATCCACCTGTTTACCCTGACCAATCTGGGAGCCCCTGCCGCCTTCAAGTAC  
TTTGACACCACCATCGACCGGAAGAGGTACACCAGCACCAAAGAGGTGCT  
GGACGCCACCCTGATCCACCAGAGCATCACCGGCCTGTACGAGACACGGA  
TCGACCTGTCTCAGCTGGGAGGCGACAAAAGGCCGGCGGCCACGAAAAA  
GGCCGGCCAGGCAAAAAAGAAAAAGTAAGAATTCCTAGAGCTCGCTGATC  
AGCCTCGACTGTGCCTTCTAGTTGCCAGCCATCTGTTGTTTGCCCTCCCCC  
GTGCCTTCCTTGACCCTGGAAGGTGCCACTCCCACTGTCCTTTCCTAATAA  
AATGAGGAAATTGCATCGCATTGTCTGAGTAGGTGTCATTCTATTCTGGGGG  
GTGGGGTGGGGCAGGACAGCAAGGGGGAGGATTGGGAAGAGAATAGCAG  
GCATGCTGGGGAGCGGCCGAGGAACCCTAGTGATGGAGTGGCTCCCCC  
TTTTGGGGGGGGGC
